# Supplementary material for: Detection and Distribution of Viruses Infecting Garlic Crops in Australia
Source: MDPI journal article supplement (doi:10.3390/plants10051013), 2021-05-19
Supplement: s1 [file s1]

**Table S1.** Record of reference isolates, their host species and geographic origin, used to generate probes through specific RT-PCR. Virus acronyms are as follows: GarVA, -B, -C, and -X = *garlic virus A, -B, -C, and -X*, GCLV = *garlic common latent virus*, SLV = *shallot latent virus*, OYDV = *onion yellow dwarf virus*, SYSV = *shallot yellow stripe virus* and LYSV = *leek yellow stripe virus*.

| Isolate number | Host species                                         | Country of Origin  | Virus specific probes    |
|----------------|------------------------------------------------------|--------------------|--------------------------|
| 3185           | <i>Allium sativum</i> , garlic                       | Gatton, Australia  | GarVA, GarVX, GCLV, OYDV |
| 3188           | <i>Allium sativum</i> , garlic                       | Gatton, Australia  | GarVC                    |
| 3191           | <i>Allium sativum</i> , garlic                       | Gatton, Australia  | GarVB, SLV               |
| Q4608          | <i>Allium cepa</i> , shallot                         | Cirebon, Indonesia | SLV, SYSV                |
| Q4609          | <i>Allium cepa</i> , shallot                         | Indonesia (IVEGRI) | SLV                      |
| PC-0451 DSMZ   | <i>Allium ampeloprasum</i> var. <i>porrum</i> , leek | Indonesia          | LYSV                     |
| PV-0622        | <i>Allium ascalonicum</i> , shallot                  | Slovenia           | ShVX                     |

**Table S2** Primer sequence information for amplification of degenerate PCR products for the allexi-, carla-, and potyviruses.

| Primer | Sequence (5'-3')                                  | Target         | Product size w/ Poty1 (bp) | Reference                 | Use              |
|--------|---------------------------------------------------|----------------|----------------------------|---------------------------|------------------|
| Poty1  | GGATCCCGGGTTTTTTTTTTTTTTT<br>TV                   | Poly A tail    | na                         | Gibbs and MacKenzie, 1997 | cDNA and reverse |
| AlcarF | TGCTGCYTTTGATACYTTCGAT                            | Carlavirus es  | 715                        | This study                | Forward          |
| pGV3t  | TGGNCNTGCTACCACAANGG                              | Allexivirus es | 950                        | Chen et al, 2004          | Forward          |
| U341   | CCGGAATTCATGRTITGGTGYATIG<br>AIAAYGG <sup>1</sup> | Potyviruse s   | 600-850                    | Langeveld et al., 1991    | Forward          |

**Table S3** Primer sequence information for PCR labelling of species-specific probes

| Primer name | Sequence (5'-3')       | Genus  | Product size (bp) |
|-------------|------------------------|--------|-------------------|
| GarVA_F     | TCGTCGAAAACCTATTGCACCT | Allexi | 507               |
| GarVA_R     | GAAGTGCCTTGAAATGGCTTA  |        |                   |
| GarVB_F     | GGGCAAACAGCAGAATAAGC   | Allexi | 610               |
| GarVB_R     | ATAGCTTAGCGGGTCCTTCA   |        |                   |
| GarVC_F     | GCTGAACTCAAAGACTTAGT   | Allexi | 509               |
| GarVC_R     | TCTTACGTCCTAATTTCA     |        |                   |
| GarVX_F     | CACCTTGTGGCATGCCTC     | Allexi | 500               |
| GarVX_R     | GCTTTACGTCCTAATTTTC    |        |                   |
| ShVX_F      | GTGAGTGTCTTTGGTCACGT   | Allexi | 500               |
| ShVX_R      | ACTAGAGCCGACCTCCTAGG   |        |                   |
| GCLV_F      | GGCAAACCAAAGGTTACACT   | Carla  | 572               |
| GCLV_R      | GTAAGATACCTAATCGTCCC   |        |                   |
| SLV_F       | GCTTTCGCAACACAAGAA     | Carla  | 500               |
| SLV_R       | TCGTTCCCACTTATACATTA   |        |                   |
| LYSV_F      | AGCAGGCTTATATGCCAAGG   | Poty   | 550               |
| LYSV_R      | AAAACCGTACTCCGGGTAGA   |        |                   |
| OYDV_F      | TCAGGGAATTGGACTATGATG  | Poty   | 535               |
| OYDV_R      | TCAGATTAAACGGAAATGAAGA |        |                   |
| SYSV_F      | TTGGACGATGATGGATGGCG   | Poty   | 500               |
| SYSV_R      | CTATGCCACAAACGGTGTT    |        |                   |
| IYSV_F      | GTTTAGAAGACTCACCAATG   | Tospo  | 837               |
| IYSV_R      | ACCAGAGGAAGCCCGCAG     |        |                   |

**Table S4** Primer sequence information for amplicon sequencing of the coat protein (CP) of nine garlic virus species

| Primer name | Sequence (5'-3')            | Genus  | Product size (bp) |
|-------------|-----------------------------|--------|-------------------|
| GVA_CP_F    | ACTGGAAGGGTGAATTAGATGAGT    | Allexi | 854               |
| GVA_CP_R    | TGGCAAARTGYAGGCAGCAA        | Allexi |                   |
| GVB_CP_F    | TCAGGGATGATGGTTTGTGTT       | Allexi | 878               |
| GVB_CP_R    | GGGAGRTTGGGTTGAGCAAA        | Allexi |                   |
| GVC_CP_F    | TCGTGAATGCGGCCATGACT        | Allexi | 916               |
| GVC_CP_R1   | GTGCCCTGGAAGGGCTTATT        | Allexi |                   |
| GVC_CP_R2   | GTGAAATGAAGGCAGCAGAG        | Allexi | 772               |
| GVX_CP_F    | TGCAACCATTGAGCGACTCT        | Allexi | 910               |
| GVX_CP_R    | TGAAGACAGGCGAGCARGTT        | Allexi |                   |
| GCLV_CP_F   | ACGCTTGAGGTAGCCAAACA        | Carla  | 1073              |
| GCLV_CP_R   | TAGGCACGCCACTAYCACAC        | Carla  |                   |
| SLV_CP_F    | ACAGCGCTCTAAATTGATATTATGACT | Carla  | 935               |
| SLV_CP_R    | ACGGTAAGTTCTYTGTTGATCA      | Carla  |                   |
| LYSV_CP_F   | GATGCACCTCCGGATGAAA         | Poty   | 938               |
| LYSV_CP_R   | TTTAAGTGGAAGTCYATAACCGRT    | Poty   |                   |
| OYDV_CP_F   | GCGGGGGAAGGAGAAGATGCAG      | Poty   | 730               |
| OYDV_CP_R   | CCGCAGCTGTGTGTCTTTCCG       | Poty   |                   |
| SYSV_CP_F   | AATCCTGGATGATCGTATACCG      | Poty   | 923               |
| SYSV_CP_R   | ACTATGCCACAAACGYTGGT        | Poty   |                   |

**Table S5** Distance matrix showing percent nucleotide identities of coat protein sequences of potyviruses. Australian isolates from this study (Eastern Australia) are shown in orange and from Western Australia in light blue (GenBank accessions).

| 4                | Y11826 | MH686302 | MH686301 | MH686300 | KY347900 | KR025485 | KF862691 | KF632715 | KF632714 | KF623541 | KF623540 | JX433020 | JX433019 | JX429964 | JN127342 | HQ918256 | HQ873798 | HQ258894 | GQ475410 | F1765739 | DQ925455 | AY390253 | AJ292224 | KF597285 | JX429967 | JN127340 | GQ475418 | DQ402056 | DQ293982 | DQ925458 | AB693978 | AB669435 |
|------------------|--------|----------|----------|----------|----------|----------|----------|----------|----------|----------|----------|----------|----------|----------|----------|----------|----------|----------|----------|----------|----------|----------|----------|----------|----------|----------|----------|----------|----------|----------|----------|----------|
| Y11826<br>OYDV   |        | 82.13    | 82.04    | 81.97    | 96.29    | 98.07    | 82.64    | 81.45    | 82.94    | 87.63    | 95.19    | 98.98    | 96.06    | 81.67    | 82.25    | 84.31    | 82.82    | 82.28    | 82.07    | 82.96    | 82.49    | 83.98    | 82.67    | 62.54    | 61.79    | 62.28    | 61.9     | 63.79    | 59.88    | 74.37    | 74.45    | 74.23    |
| MH686302<br>OYDV | 82.13  |          | 86.9     | 99.7     | 81.53    | 81.38    | 85.44    | 86.34    | 86.49    | 81.56    | 82.13    | 81.98    | 81.98    | 86.41    | 98.8     | 81.61    | 86.96    | 87.24    | 86.81    | 80.06    | 93.39    | 81.03    | 80.06    | 63.1     | 62.52    | 63.17    | 63.27    | 63.32    | 60.16    | 72.13    | 71.85    | 72.15    |
| MH686301<br>OYDV | 82.04  | 86.9     |          | 86.6     | 81.58    | 81.43    | 86.91    | 86.3     | 87.22    | 80.4     | 81.89    | 82.04    | 81.28    | 98.25    | 87.52    | 84.13    | 86.47    | 99.7     | 85.71    | 84.04    | 86.61    | 85.3     | 84.65    | 62.16    | 62.31    | 62.52    | 62.78    | 62.39    | 60.34    | 75.38    | 73.8     | 74.78    |
| MH686300<br>OYDV | 81.97  | 99.7     | 86.6     |          | 81.36    | 81.21    | 85.76    | 86.67    | 86.52    | 81.39    | 81.97    | 81.82    | 81.82    | 86.14    | 98.79    | 81.52    | 86.99    | 86.82    | 86.84    | 79.88    | 93.33    | 80.85    | 79.88    | 62.78    | 62.19    | 62.84    | 62.94    | 63.29    | 60.16    | 72.33    | 72.35    | 72.35    |
| KY347900<br>OYDV | 96.29  | 81.53    | 81.58    | 81.36    |          | 95.85    | 81.6     | 81.16    | 81.31    | 87.56    | 94.66    | 96.44    | 94.96    | 81.01    | 81.75    | 82.66    | 82.37    | 81.75    | 81.63    | 82.07    | 82.64    | 83.36    | 82.22    | 62.37    | 61.79    | 62.28    | 62.1     | 63.89    | 60.34    | 73.92    | 74.45    | 73.94    |
| KR025485<br>OYDV | 98.07  | 81.38    | 81.43    | 81.21    | 95.85    |          | 82.94    | 81.16    | 82.05    | 87.26    | 95.25    | 98.22    | 95.25    | 80.86    | 81.31    | 83.26    | 82.52    | 81.6     | 81.78    | 82.37    | 81.75    | 83.67    | 82.07    | 62.23    | 62.08    | 61.98    | 61.96    | 63.89    | 60.34    | 74.37    | 74.74    | 74.09    |
| KF862691<br>OYDV | 82.64  | 85.44    | 86.91    | 85.76    | 81.6     | 82.94    |          | 91.1     | 86.94    | 81.93    | 82.79    | 82.34    | 81.6     | 86.28    | 85.61    | 81.91    | 90.96    | 87.24    | 90.22    | 82.52    | 85.31    | 83.05    | 83.26    | 62.81    | 62.23    | 63.17    | 62.25    | 64.6     | 60.95    | 74.37    | 73.42    | 73.5     |
| KF632715<br>OYDV | 81.45  | 86.34    | 86.3     | 86.67    | 81.16    | 81.16    | 91.1     |          | 85.76    | 80.59    | 81.6     | 81.45    | 80.71    | 85.98    | 86.2     | 81.31    | 97.48    | 86.8     | 96.74    | 83.11    | 85.46    | 83.67    | 83.56    | 62.37    | 60.76    | 62.13    | 61.1     | 61.15    | 60.34    | 73.92    | 73.86    | 72.91    |
| KF632714<br>OYDV | 82.94  | 86.49    | 87.22    | 86.52    | 81.31    | 82.05    | 86.94    | 85.76    |          | 81.2     | 80.91    | 82.14    | 81.55    | 86.61    | 87.28    | 86.56    | 85.93    | 87.43    | 85.19    | 82.67    | 85.46    | 83.83    | 82.96    | 64.91    | 62.08    | 63.17    | 63.3     | 64.35    | 60.51    | 73.32    | 73.42    | 74.38    |
| KF623541<br>OYDV | 87.63  | 81.56    | 80.4     | 81.39    | 87.56    | 87.26    | 81.93    | 80.59    | 81.2     |          | 88.57    | 87.86    | 87.43    | 80.61    | 81.68    | 81.93    | 81.66    | 80.97    | 80.92    | 80.33    | 81.63    | 81.52    | 80.62    | 62.1     | 60.91    | 62.43    | 61.34    | 61.94    | 58.51    | 72.43    | 73.17    | 73.21    |
| KF623540<br>OYDV | 95.19  | 82.13    | 81.89    | 81.97    | 94.66    | 95.25    | 82.79    | 81.6     | 80.91    | 88.57    |          | 95.72    | 96.58    | 81.61    | 82.1     | 82.36    | 82.67    | 82.13    | 81.93    | 82.22    | 82.05    | 83.52    | 82.22    | 62.39    | 62.23    | 62.13    | 62.14    | 63.57    | 58.73    | 73.77    | 73.42    | 73.06    |
| JX433020<br>OYDV | 98.98  | 81.98    | 82.04    | 81.82    | 96.44    | 98.22    | 82.34    | 81.45    | 82.14    | 87.86    | 95.72    |          | 96.53    | 81.75    | 82.1     | 83.56    | 82.82    | 82.28    | 82.07    | 82.37    | 82.34    | 83.67    | 82.37    | 62.25    | 61.64    | 62.28    | 61.67    | 63.48    | 59.73    | 74.37    | 73.86    | 74.23    |
| JX433019<br>OYDV | 96.06  | 81.98    | 81.28    | 81.82    | 94.96    | 95.25    | 81.6     | 80.71    | 81.55    | 87.43    | 96.58    | 96.53    |          | 80.88    | 81.95    | 82.81    | 81.78    | 81.39    | 81.04    | 81.63    | 82.34    | 83.36    | 81.93    | 62.39    | 62.23    | 61.54    | 61.43    | 62.67    | 58.46    | 73.47    | 72.98    | 73.5     |
| JX429964<br>OYDV | 81.67  | 86.41    | 98.25    | 86.14    | 81.01    | 80.86    | 86.28    | 85.98    | 86.61    | 80.61    | 81.61    | 81.75    | 80.88    |          | 87.06    | 83.78    | 86       | 98.15    | 85.56    | 83.41    | 85.68    | 84.45    | 84       | 61.95    | 61.64    | 62.5     | 62.7     | 62.61    | 60.09    | 74.67    | 73.42    | 74.52    |
| JN127342<br>OYDV | 82.25  | 98.8     | 87.52    | 98.79    | 81.75    | 81.31    | 85.61    | 86.2     | 87.28    | 81.68    | 82.1     | 82.1     | 81.95    | 87.06    |          | 81.91    | 86.96    | 87.87    | 86.52    | 80.59    | 93.18    | 81.49    | 80.89    | 63.45    | 62.81    | 63.17    | 63.65    | 63.27    | 59.63    | 71.98    | 71.95    | 71.89    |
| HQ918256<br>OYDV | 84.31  | 81.61    | 84.13    | 81.52    | 82.66    | 83.26    | 81.91    | 81.31    | 86.56    | 81.93    | 82.36    | 83.56    | 82.81    | 83.78    | 81.91    |          | 81.76    | 84.16    | 81.91    | 83.26    | 81.91    | 85.15    | 83.26    | 62.96    | 60.62    | 62.28    | 62.34    | 63.99    | 61.49    | 73.32    | 72.85    | 73.44    |
| HQ873798<br>OYDV | 82.82  | 86.96    | 86.47    | 86.99    | 82.37    | 82.52    | 90.96    | 97.48    | 85.93    | 81.66    | 82.67    | 82.82    | 81.78    | 86       | 86.96    | 81.76    |          | 86.96    | 99.26    | 83.11    | 86.67    | 83.67    | 83.41    | 62.37    | 60.76    | 62.43    | 61.24    | 62.16    | 60.95    | 74.52    | 74.6     | 73.65    |
| HQ258894<br>OYDV | 82.28  | 87.24    | 99.7     | 86.82    | 81.75    | 81.6     | 87.24    | 86.8     | 87.43    | 80.97    | 82.13    | 82.28    | 81.39    | 98.15    | 87.87    | 84.16    | 86.96    |          | 86.22    | 84.15    | 86.35    | 85.38    | 84.74    | 62.48    | 62.37    | 62.87    | 62.98    | 62.75    | 60.55    | 74.96    | 73.72    | 74.38    |
| GQ475410<br>OYDV | 82.07  | 86.81    | 85.71    | 86.84    | 81.63    | 81.78    | 90.22    | 96.74    | 85.19    | 80.92    | 81.93    | 82.07    | 81.04    | 85.56    | 86.52    | 81.91    | 99.26    | 86.22    |          | 82.37    | 86.22    | 83.2     | 82.67    | 62.23    | 60.62    | 62.28    | 61.1     | 61.58    | 60.95    | 74.67    | 74.45    | 73.5     |
| F1765739<br>OYDV | 82.96  | 80.06    | 84.04    | 79.88    | 82.07    | 82.37    | 82.52    | 83.11    | 82.67    | 80.33    | 82.22    | 82.37    | 81.63    | 83.41    | 80.59    | 83.26    | 83.11    | 84.15    | 82.37    |          | 80.74    | 97.51    | 97.63    | 61.64    | 61.2     | 61.98    | 60.81    | 62.88    | 59.72    | 73.77    | 72.1     | 73.61    |
| DQ925455<br>OYDV | 82.49  | 93.39    | 86.61    | 93.33    | 82.64    | 81.75    | 85.31    | 85.46    | 85.46    | 81.63    | 82.05    | 82.34    | 82.34    | 85.68    | 93.18    | 81.91    | 86.67    | 86.35    | 86.22    | 80.74    |          | 81.8     | 80.59    | 62.52    | 62.37    | 62.87    | 62.97    | 63.02    | 60.18    | 72.28    | 72.54    | 73.35    |
| AY390253<br>OYDV | 83.98  | 81.03    | 85.3     | 80.85    | 83.36    | 83.67    | 83.05    | 83.67    | 83.83    | 81.52    | 83.52    | 83.67    | 83.36    | 84.45    | 81.49    | 85.15    | 83.67    | 85.38    | 83.2     | 97.51    | 81.8     |          | 97.36    | 63.05    | 62.6     | 63.36    | 62.14    | 64.79    | 61.73    | 75       | 74.38    | 75.62    |
| AJ292224<br>OYDV | 82.67  | 80.06    | 84.65    | 79.88    | 82.22    | 82.07    | 83.26    | 83.56    | 82.96    | 80.62    | 82.22    | 82.37    | 81.93    | 84       | 80.89    | 83.26    | 83.41    | 84.74    | 82.67    | 97.63    | 80.59    | 97.36    |          | 62.67    | 62.37    | 61.98    | 61.82    | 62.73    | 59.57    | 74.07    | 72.54    | 74.34    |
| KF597285<br>LYSV | 62.54  | 63.1     | 62.16    | 62.78    | 62.37    | 62.23    | 62.81    | 62.37    | 64.91    | 62.1     | 62.39    | 62.25    | 62.39    | 61.95    | 63.45    | 62.96    | 62.37    | 62.48    | 62.23    | 61.64    | 62.52    | 63.05    | 62.67    |          | 89.91    | 82.01    | 92.63    | 79.09    | 80.79    | 61.79    | 61.02    | 62.28    |
| JX429967<br>LYSV | 61.79  | 62.52    | 62.31    | 62.19    | 61.79    | 62.08    | 62.23    | 60.76    | 62.08    | 60.91    | 62.23    | 61.64    | 62.23    | 61.64    | 62.81    | 60.62    | 60.76    | 62.37    | 60.62    | 61.2     | 62.37    | 62.6     | 62.37    | 89.91    |          | 80.81    | 93.78    | 79.88    | 81.42    | 62.37    | 60.88    | 61.99    |

|                     |       |       |       |       |       |       |       |       |       |       |       |       |       |       |       |       |       |       |       |       |       |       |       |       |       |       |       |       |       |       |       |       |
|---------------------|-------|-------|-------|-------|-------|-------|-------|-------|-------|-------|-------|-------|-------|-------|-------|-------|-------|-------|-------|-------|-------|-------|-------|-------|-------|-------|-------|-------|-------|-------|-------|-------|
| JN127340<br>LYSV WA | 62.28 | 63.17 | 62.52 | 62.84 | 62.28 | 61.98 | 63.17 | 62.13 | 63.17 | 62.43 | 62.13 | 62.28 | 61.54 | 62.5  | 63.17 | 62.28 | 62.43 | 62.87 | 62.28 | 61.98 | 62.87 | 63.36 | 61.98 | 82.01 | 80.81 |       | 81.14 | 79.67 | 82.8  | 61.69 | 62.48 | 62.13 |
| GQ475418<br>LYSV    | 61.9  | 63.27 | 62.78 | 62.94 | 62.1  | 61.96 | 62.25 | 61.1  | 63.3  | 61.34 | 62.14 | 61.67 | 61.43 | 62.7  | 63.65 | 62.34 | 61.24 | 62.98 | 61.1  | 60.81 | 62.97 | 62.14 | 61.82 | 92.63 | 93.78 | 81.14 |       | 79.49 | 79.16 | 62.81 | 61.24 | 62.16 |
| DQ402056<br>LYSV    | 63.79 | 63.32 | 62.39 | 63.29 | 63.89 | 63.89 | 64.6  | 61.15 | 64.35 | 61.94 | 63.57 | 63.48 | 62.67 | 62.61 | 63.27 | 63.99 | 62.16 | 62.75 | 61.58 | 62.88 | 63.02 | 64.79 | 62.73 | 79.09 | 79.88 | 79.67 | 79.49 |       | 82.1  | 60.97 | 61.53 | 60.63 |
| DQ299382<br>LYSV    | 59.88 | 60.16 | 60.34 | 60.16 | 60.34 | 60.34 | 60.95 | 60.34 | 60.51 | 58.51 | 58.73 | 59.73 | 58.46 | 60.09 | 59.63 | 61.49 | 60.95 | 60.55 | 60.95 | 59.72 | 60.18 | 61.73 | 59.57 | 80.79 | 81.42 | 82.8  | 79.16 | 82.1  |       | 60.13 | 60.64 | 60.86 |
| DQ925458<br>SYSV    | 74.37 | 72.13 | 75.38 | 72.33 | 73.92 | 74.37 | 74.37 | 73.92 | 73.32 | 72.43 | 73.77 | 74.37 | 73.47 | 74.67 | 71.98 | 73.32 | 74.52 | 74.96 | 74.67 | 73.77 | 72.28 | 75    | 74.07 | 61.79 | 62.37 | 61.69 | 62.81 | 60.97 | 60.13 |       | 90.05 | 90.18 |
| A8693978<br>SYSV    | 74.45 | 71.85 | 73.8  | 72.35 | 74.45 | 74.74 | 73.42 | 73.86 | 73.42 | 73.17 | 73.42 | 73.86 | 72.98 | 73.42 | 71.95 | 72.85 | 74.6  | 73.72 | 74.45 | 72.1  | 72.54 | 74.38 | 72.54 | 61.02 | 60.88 | 62.48 | 61.24 | 61.53 | 60.64 | 90.05 |       | 88.87 |
| A8669435<br>SYSV    | 74.23 | 72.15 | 74.78 | 72.35 | 73.94 | 74.09 | 73.5  | 72.91 | 74.38 | 73.21 | 73.06 | 74.23 | 73.5  | 74.52 | 71.89 | 73.44 | 73.65 | 74.38 | 73.5  | 73.61 | 73.35 | 75.62 | 74.34 | 62.28 | 61.99 | 62.13 | 62.16 | 60.63 | 60.86 | 90.18 | 88.87 |       |

**Table S6** Distance matrix showing percent nucleotide identities of coat protein sequences of carlaviruses. Australian isolates from this study (Eastern Australia) are shown in orange and from Western Australia in light blue (GenBank accessions).

|               | MH686306 | MH686305 | LC27526 | JX429968 | JX429966 | JQ899443 | JF320811 | HQ258896 | GU355922 | GU120175 | DQ520093 | AJ409116 | AB048002 | AB046886 | AB046886 | AB04567 | KP208802 | KJ801307 | KF862699 | JQ899445 | JQ818259 | JF320810 | HQ873863 | HQ873861 | MH686304 | MH686303 | DQ520092 | AF228416 | AB048004 | AB04566 |
|---------------|----------|----------|---------|----------|----------|----------|----------|----------|----------|----------|----------|----------|----------|----------|----------|---------|----------|----------|----------|----------|----------|----------|----------|----------|----------|----------|----------|----------|----------|---------|
| MH686306 SLV  |          | 92.58    | 78.11   | 89.22    | 91.44    | 86.47    | 89.21    | 92.34    | 97.48    | 88.62    | 89.33    | 92.58    | 87.65    | 94.01    | 94.01    | 89.09   | 55.75    | 54.82    | 55.05    | 54.36    | 55.05    | 54.01    | 54.94    | 54.82    | 55.52    | 55.75    | 55.17    | 54.82    | 54.01    | 55.75   |
| MH686305 SLV  | 92.58    |          | 78.20   | 89.93    | 96.52    | 85.95    | 89.10    | 98.83    | 92.73    | 88.76    | 89.45    | 98.94    | 88.04    | 92.85    | 92.85    | 89.22   | 55.73    | 55.52    | 55.06    | 54.49    | 55.06    | 54.73    | 54.72    | 54.61    | 55.29    | 55.52    | 55.29    | 55.29    | 54.72    | 55.75   |
| LC279526 SLV  | 78.11    | 78.20    |         | 79.39    | 79.87    | 78.51    | 78.92    | 78.10    | 78.92    | 78.83    | 79.63    | 78.31    | 80.56    | 79.51    | 79.51    | 79.39   | 54.02    | 54.28    | 53.62    | 52.85    | 53.84    | 53.46    | 52.96    | 52.85    | 53.51    | 53.51    | 54.06    | 54.28    | 53.51    | 53.29   |
| JX429968 SLV  | 89.22    | 89.93    | 79.39   |          | 89.49    | 88.19    | 90.07    | 89.97    | 90.04    | 88.29    | 89.10    | 90.28    | 88.98    | 89.92    | 89.92    | 89.57   | 56.38    | 55.70    | 55.48    | 54.61    | 55.15    | 55.51    | 54.72    | 54.61    | 55.81    | 56.03    | 55.92    | 55.81    | 55.15    | 54.93   |
| JX429966 SLV  | 91.44    | 96.52    | 79.87   | 89.49    |          | 87.89    | 92.17    | 96.81    | 91.61    | 89.95    | 91.10    | 96.65    | 89.81    | 91.87    | 91.87    | 90.71   | 56.97    | 55.96    | 55.46    | 54.61    | 54.84    | 54.41    | 55.21    | 54.96    | 54.89    | 55.00    | 55.46    | 55.58    | 54.81    | 55.54   |
| JQ899443 SLV  | 86.47    | 85.95    | 78.51   | 88.19    | 87.89    |          | 90.16    | 86.32    | 87.10    | 89.46    | 89.80    | 86.89    | 89.33    | 86.17    | 86.17    | 90.39   | 56.76    | 56.36    | 56.59    | 55.57    | 55.91    | 56.21    | 55.11    | 55.00    | 56.02    | 56.25    | 56.71    | 55.34    | 55.46    | 55.57   |
| JF320811 SLV  | 89.21    | 89.10    | 78.92   | 90.07    | 92.17    | 90.16    |          | 89.50    | 89.67    | 92.03    | 93.90    | 89.45    | 91.78    | 89.32    | 89.32    | 94.37   | 56.27    | 55.81    | 55.59    | 55.04    | 54.72    | 55.73    | 54.93    | 54.72    | 55.81    | 56.03    | 55.92    | 55.04    | 55.15    | 55.59   |
| HQ258896 SLV  | 92.34    | 98.83    | 78.10   | 89.97    | 96.81    | 86.32    | 89.50    |          | 92.73    | 89.34    | 89.92    | 99.06    | 88.63    | 92.97    | 92.97    | 89.68   | 55.56    | 54.46    | 53.92    | 53.00    | 54.14    | 53.78    | 53.71    | 53.60    | 54.08    | 54.18    | 54.35    | 54.46    | 53.28    | 54.02   |
| GU355922 GVL  | 97.48    | 92.73    | 78.92   | 90.04    | 91.61    | 87.10    | 89.67    | 92.73    |          | 88.75    | 89.32    | 92.97    | 88.03    | 94.25    | 94.25    | 89.32   | 55.49    | 54.84    | 55.06    | 54.04    | 55.18    | 54.28    | 55.06    | 54.95    | 55.52    | 55.75    | 55.29    | 54.61    | 54.15    | 55.86   |
| GU120175 SLV  | 88.62    | 88.76    | 78.83   | 88.29    | 89.95    | 89.46    | 92.03    | 89.34    | 88.75    |          | 92.15    | 89.34    | 91.33    | 88.28    | 88.28    | 92.26   | 56.22    | 55.97    | 55.29    | 55.40    | 55.86    | 55.19    | 54.04    | 53.93    | 55.75    | 55.97    | 55.75    | 55.06    | 54.84    | 56.43   |
| DQ520093 GVL  | 89.33    | 89.45    | 79.63   | 89.10    | 91.10    | 89.80    | 93.90    | 89.92    | 89.32    | 92.15    |          | 90.15    | 90.85    | 89.32    | 89.32    | 98.12   | 56.46    | 56.31    | 56.77    | 55.29    | 55.75    | 55.64    | 55.52    | 55.40    | 56.66    | 56.88    | 56.54    | 55.75    | 55.29    | 55.75   |
| AJ409116 GVL  | 92.58    | 98.94    | 78.31   | 90.28    | 96.65    | 86.89    | 89.45    | 99.06    | 92.97    | 89.34    | 90.15    |          | 88.28    | 93.08    | 93.08    | 89.92   | 55.98    | 55.40    | 55.40    | 54.61    | 55.18    | 54.85    | 54.95    | 54.84    | 55.18    | 55.40    | 55.18    | 55.18    | 54.84    | 55.86   |
| AB048002 SLVJ | 87.65    | 88.04    | 80.56   | 88.98    | 89.81    | 89.33    | 91.78    | 88.63    | 88.03    | 91.33    | 90.85    | 88.28    |          | 87.91    | 87.91    | 91.43   | 56.71    | 56.88    | 56.09    | 56.31    | 55.86    | 56.21    | 55.18    | 55.06    | 56.77    | 57.00    | 56.77    | 55.97    | 56.31    | 55.63   |
| AB046886 GVL  | 94.01    | 92.85    | 79.51   | 89.92    | 91.87    | 86.17    | 89.32    | 92.97    | 94.25    | 88.28    | 89.32    | 93.08    | 87.91    |          | 100.00   | 89.09   | 55.61    | 54.61    | 54.72    | 53.58    | 54.61    | 53.82    | 54.49    | 54.38    | 54.72    | 54.95    | 54.49    | 54.04    | 54.49    | 55.18   |
| AB046886 GLV  | 94.01    | 92.85    | 79.51   | 89.92    | 91.87    | 86.17    | 89.32    | 92.97    | 94.25    | 88.28    | 89.32    | 93.08    | 87.91    | 100.00   |          | 89.09   | 55.61    | 54.61    | 54.72    | 53.58    | 54.61    | 53.82    | 54.49    | 54.38    | 54.72    | 54.95    | 54.49    | 54.04    | 54.49    | 55.18   |
| AB04567 GLV   | 89.09    | 89.22    | 79.39   | 89.57    | 90.71    | 90.39    | 94.37    | 89.68    | 89.32    | 92.26    | 98.12    | 89.92    | 91.43    | 89.09    | 89.09    |         | 56.83    | 55.86    | 56.54    | 55.40    | 55.52    | 55.30    | 55.06    | 54.95    | 55.97    | 56.20    | 56.20    | 55.29    | 55.29    | 55.86   |
| KP208802 GCLV | 55.75    | 55.73    | 54.02   | 56.38    | 56.97    | 56.76    | 56.27    | 55.56    | 55.49    | 56.22    | 56.46    | 55.98    | 56.71    | 55.61    | 55.61    | 56.83   |          | 90.45    | 93.27    | 88.77    | 89.26    | 89.02    | 93.28    | 93.40    | 89.47    | 89.72    | 89.99    | 89.36    | 90.45    | 90.09   |
| KJ801307 GCLV | 54.82    | 55.52    | 54.28   | 55.70    | 55.96    | 56.36    | 55.81    | 54.46    | 54.84    | 55.97    | 56.31    | 55.40    | 56.88    | 54.61    | 54.61    | 55.86   | 90.45    |          | 89.07    | 93.46    | 95.85    | 95.35    | 89.29    | 89.40    | 96.57    | 96.88    | 96.57    | 95.32    | 94.70    | 89.81   |
| KF862699 GCLV | 55.05    | 55.06    | 53.62   | 55.48    | 55.46    | 56.59    | 55.59    | 53.92    | 55.06    | 55.29    | 56.77    | 55.40    | 56.09    | 54.72    | 54.72    | 56.54   | 93.27    | 89.07    |          | 87.94    | 87.73    | 87.79    | 91.88    | 91.88    | 88.24    | 88.45    | 88.15    | 88.03    | 89.29    | 87.62   |
| JQ899445 GCLV | 54.36    | 54.49    | 52.85   | 54.61    | 54.61    | 55.57    | 55.04    | 53.00    | 54.04    | 55.40    | 55.29    | 54.61    | 56.31    | 53.58    | 53.58    | 55.40   | 88.77    | 93.46    | 87.94    |          | 92.52    | 92.82    | 88.06    | 88.16    | 92.47    | 92.12    | 93.45    | 92.63    | 93.90    | 88.53   |
| JQ818259 GCLV | 55.05    | 55.06    | 53.84   | 55.15    | 54.84    | 55.91    | 54.72    | 54.14    | 55.18    | 55.86    | 55.75    | 55.18    | 55.86    | 54.61    | 54.61    | 55.52   | 89.26    | 95.85    | 87.73    | 92.52    |          | 93.95    | 88.45    | 88.55    | 95.33    | 95.64    | 96.35    | 94.17    | 93.36    | 89.41   |
| JF320810 GCLV | 54.01    | 54.73    | 53.46   | 55.51    | 54.41    | 56.21    | 55.73    | 53.78    | 54.28    | 55.19    | 55.64    | 54.85    | 56.21    | 53.82    | 53.82    | 55.30   | 89.02    | 95.35    | 87.79    | 92.82    | 93.95    |          | 88.27    | 88.39    | 93.92    | 94.05    | 95.00    | 93.50    | 93.83    | 90.51   |
| HQ873863 GCLV | 54.94    | 54.72    | 52.96   | 54.72    | 55.21    | 55.11    | 54.93    | 53.71    | 55.06    | 54.04    | 55.52    | 54.95    | 55.18    | 54.49    | 54.49    | 55.06   | 93.28    | 89.29    | 91.88    | 88.06    | 88.45    | 88.27    |          | 99.58    | 88.05    | 88.36    | 88.66    | 88.65    | 89.10    | 88.88   |
| HQ873861 GCLV | 54.82    | 54.61    | 52.85   | 54.61    | 54.96    | 55.00    | 54.72    | 53.60    | 54.95    | 53.93    | 55.40    | 54.84    | 55.06    | 54.38    | 54.38    | 54.95   | 93.40    | 89.40    | 91.88    | 88.16    | 88.55    | 88.39    | 99.58    |          | 88.15    | 88.46    | 88.76    | 88.75    | 89.20    | 88.88   |
| MH686304 GCLV | 55.52    | 55.29    | 53.51   | 55.81    | 54.89    | 56.02    | 55.81    | 54.08    | 55.52    | 55.75    | 56.66    | 55.18    | 56.77    | 54.72    | 54.72    | 55.97   | 89.47    | 96.57    | 88.24    | 92.47    | 95.33    | 93.92    | 88.05    | 88.15    |          | 99.30    | 96.47    | 94.80    | 93.97    | 88.93   |
| MH686303 GCLV | 55.75    | 55.52    | 53.51   | 56.03    | 55.00    | 56.25    | 56.03    | 54.18    | 55.75    | 55.97    | 56.88    | 55.40    | 57.00    | 54.95    | 54.95    | 56.20   | 89.72    | 96.88    | 88.45    | 92.12    | 95.64    | 94.05    | 88.36    | 88.46    | 99.30    |          | 96.78    | 94.91    | 93.68    | 88.50   |
| DQ520092 GCLV | 55.17    | 55.29    | 54.06   | 55.92    | 55.46    | 56.71    | 55.92    | 54.35    | 55.29    | 55.75    | 56.54    | 55.18    | 56.77    | 54.49    | 54.49    | 56.20   | 89.99    | 96.57    | 88.15    | 93.45    | 96.35    | 95.00    | 88.66    | 88.76    | 96.47    | 96.78    |          | 95.32    | 94.09    | 89.20   |
| AF228416 GCLV | 54.82    | 55.29    | 54.28   | 55.81    | 55.58    | 55.34    | 55.04    | 54.46    | 54.61    | 55.06    | 55.75    | 55.18    | 55.97    | 54.04    | 54.04    | 55.29   | 89.36    | 95.32    | 88.03    | 92.63    | 94.17    | 93.50    | 88.65    | 88.75    | 94.80    | 94.91    | 95.32    |          | 93.15    | 88.57   |
| AB048004 GCLV | 54.01    | 54.72    | 53.51   | 55.15    | 54.81    | 55.46    | 55.15    | 53.28    | 54.15    | 54.84    | 55.29    | 54.84    | 56.31    | 54.49    | 54.49    | 55.29   | 90.45    | 94.70    | 89.29    | 93.90    | 93.36    | 93.83    | 89.10    | 89.20    | 93.97    | 93.68    | 94.09    | 93.15    |          | 90.47   |
| AB004566 GCLV | 55.75    | 55.75    | 53.29   | 54.93    | 55.54    | 55.57    | 55.59    | 54.02    | 55.86    | 56.43    | 55.75    | 55.86    | 55.63    | 55.18    | 55.18    | 55.86   | 90.09    | 89.81    | 87.62    | 88.53    | 89.41    | 90.51    | 88.88    | 88.88    | 88.93    | 88.50    | 89.20    | 88.57    | 90.47    |         |

**Table S7** Distance matrix showing percent nucleotide identities of coat protein sequences of allexiviruses. Australian isolates from this study (Eastern Australia) are shown in orange and from Western Australia in light blue (GenBank accessions).

|          | KU933691 | JX97952 | JX97951 | JX488633 | JX429970 | JX99446 | JX99444 | JN019812 | MH686308 | MH686307 | AF478197 | AB010300 | KP55793 | KM379144 | JX488620 | JN019813 | MH686310 | MH686309 | AF543829 | AB010301 | KX034780 | KP55566 | JQ899447 | JN019814 | HM777004 | KF555653 | KF446210 | JX488630 | JN019815 | LN67527 | KP71369 | KF51028 | JX429971 | JX429969 | JQ807994 | GM7542 | MH686311 | MH686312 | MH686313 | AJ32229 |
|----------|----------|---------|---------|----------|----------|---------|---------|----------|----------|----------|----------|----------|---------|----------|----------|----------|----------|----------|----------|----------|----------|---------|----------|----------|----------|----------|----------|----------|----------|---------|---------|---------|----------|----------|----------|--------|----------|----------|----------|---------|
| KU933691 | 83       | 99      | 78      | 97       | 85       | 97      | 74      | 85       | 97       | 97       | 97       | 97       | 61      | 62       | 61       | 62       | 61       | 61       | 61       | 61       | 60       | 59      | 62       | 62       | 59       | 71       | 71       | 68       | 68       | 64      | 64      | 64      | 65       | 63       | 64       | 63     | 63       | 64       | 62       |         |
| JX97952  | 83       | 99      | 78      | 97       | 85       | 97      | 74      | 85       | 97       | 97       | 97       | 97       | 61      | 62       | 61       | 62       | 61       | 61       | 61       | 61       | 60       | 59      | 62       | 62       | 59       | 71       | 71       | 68       | 68       | 64      | 64      | 64      | 65       | 63       | 64       | 63     | 63       | 64       | 62       |         |
| JX97951  | 99       | 99      | 78      | 97       | 85       | 97      | 74      | 85       | 97       | 97       | 97       | 97       | 61      | 62       | 61       | 62       | 61       | 61       | 61       | 61       | 60       | 59      | 62       | 62       | 59       | 71       | 71       | 68       | 68       | 64      | 64      | 64      | 65       | 63       | 64       | 63     | 63       | 64       | 62       |         |
| JX488633 | 99       | 99      | 78      | 97       | 85       | 97      | 74      | 85       | 97       | 97       | 97       | 97       | 61      | 62       | 61       | 62       | 61       | 61       | 61       | 61       | 60       | 59      | 62       | 62       | 59       | 71       | 71       | 68       | 68       | 64      | 64      | 64      | 65       | 63       | 64       | 63     | 63       | 64       | 62       |         |
| JX429970 | 99       | 99      | 78      | 97       | 85       | 97      | 74      | 85       | 97       | 97       | 97       | 97       | 61      | 62       | 61       | 62       | 61       | 61       | 61       | 61       | 60       | 59      | 62       | 62       | 59       | 71       | 71       | 68       | 68       | 64      | 64      | 64      | 65       | 63       | 64       | 63     | 63       | 64       | 62       |         |
| JX99446  | 99       | 99      | 78      | 97       | 85       | 97      | 74      | 85       | 97       | 97       | 97       | 97       | 61      | 62       | 61       | 62       | 61       | 61       | 61       | 61       | 60       | 59      | 62       | 62       | 59       | 71       | 71       | 68       | 68       | 64      | 64      | 64      | 65       | 63       | 64       | 63     | 63       | 64       | 62       |         |
| JX99444  | 99       | 99      | 78      | 97       | 85       | 97      | 74      | 85       | 97       | 97       | 97       | 97       | 61      | 62       | 61       | 62       | 61       | 61       | 61       | 61       | 60       | 59      | 62       | 62       | 59       | 71       | 71       | 68       | 68       | 64      | 64      | 64      | 65       | 63       | 64       | 63     | 63       | 64       | 62       |         |
| JN019812 | 99       | 99      | 78      | 97       | 85       | 97      | 74      | 85       | 97       | 97       | 97       | 97       | 61      | 62       | 61       | 62       | 61       | 61       | 61       | 61       | 60       | 59      | 62       | 62       | 59       | 71       | 71       | 68       | 68       | 64      | 64      | 64      | 65       | 63       | 64       | 63     | 63       | 64       | 62       |         |
| MH686308 | 99       | 99      | 78      | 97       | 85       | 97      | 74      | 85       | 97       | 97       | 97       | 97       | 61      | 62       | 61       | 62       | 61       | 61       | 61       | 61       | 60       | 59      | 62       | 62       | 59       | 71       | 71       | 68       | 68       | 64      | 64      | 64      | 65       | 63       | 64       | 63     | 63       | 64       | 62       |         |
| MH686307 | 99       | 99      | 78      | 97       | 85       | 97      | 74      | 85       | 97       | 97       | 97       | 97       | 61      | 62       | 61       | 62       | 61       | 61       | 61       | 61       | 60       | 59      | 62       | 62       | 59       | 71       | 71       | 68       | 68       | 64      | 64      | 64      | 65       | 63       | 64       | 63     | 63       | 64       | 62       |         |
| AF478197 | 99       | 99      | 78      | 97       | 85       | 97      | 74      | 85       | 97       | 97       | 97       | 97       | 61      | 62       | 61       | 62       | 61       | 61       | 61       | 61       | 60       | 59      | 62       | 62       | 59       | 71       | 71       | 68       | 68       | 64      | 64      | 64      | 65       | 63       | 64       | 63     | 63       | 64       | 62       |         |
| AB010300 | 99       | 99      | 78      | 97       | 85       | 97      | 74      | 85       | 97       | 97       | 97       | 97       | 61      | 62       | 61       | 62       | 61       | 61       | 61       | 61       | 60       | 59      | 62       | 62       | 59       | 71       | 71       | 68       | 68       | 64      | 64      | 64      | 65       | 63       | 64       | 63     | 63       | 64       | 62       |         |
| KP55793  | 99       | 99      | 78      | 97       | 85       | 97      | 74      | 85       | 97       | 97       | 97       | 97       | 61      | 62       | 61       | 62       | 61       | 61       | 61       | 61       | 60       | 59      | 62       | 62       | 59       | 71       | 71       | 68       | 68       | 64      | 64      | 64      | 65       | 63       | 64       | 63     | 63       | 64       | 62       |         |
| KM379144 | 99       | 99      | 78      | 97       | 85       | 97      | 74      | 85       | 97       | 97       | 97       | 97       | 61      | 62       | 61       | 62       | 61       | 61       | 61       | 61       | 60       | 59      | 62       | 62       | 59       | 71       | 71       | 68       | 68       | 64      | 64      | 64      | 65       | 63       | 64       | 63     | 63       | 64       | 62       |         |
| JX488620 | 99       | 99      | 78      | 97       | 85       | 97      | 74      | 85       | 97       | 97       | 97       | 97       | 61      | 62       | 61       | 62       | 61       | 61       | 61       | 61       | 60       | 59      | 62       | 62       | 59       | 71       | 71       | 68       | 68       | 64      | 64      | 64      | 65       | 63       | 64       | 63     | 63       | 64       | 62       |         |
| JN019813 | 99       | 99      | 78      | 97       | 85       | 97      | 74      | 85       | 97       | 97       | 97       | 97       | 61      | 62       | 61       | 62       | 61       | 61       | 61       | 61       | 60       | 59      | 62       | 62       | 59       | 71       | 71       | 68       | 68       | 64      | 64      | 64      | 65       | 63       | 64       | 63     | 63       | 64       | 62       |         |
| MH686310 | 99       | 99      | 78      | 97       | 85       | 97      | 74      | 85       | 97       | 97       | 97       | 97       | 61      | 62       | 61       | 62       | 61       | 61       | 61       | 61       | 60       | 59      | 62       | 62       | 59       | 71       | 71       | 68       | 68       | 64      | 64      | 64      | 65       | 63       | 64       | 63     | 63       | 64       | 62       |         |
| MH686309 | 99       | 99      | 78      | 97       | 85       | 97      | 74      | 85       | 97       | 97       | 97       | 97       | 61      | 62       | 61       | 62       | 61       | 61       | 61       | 61       | 60       | 59      | 62       | 62       | 59       | 71       | 71       | 68       | 68       | 64      | 64      | 64      | 65       | 63       | 64       | 63     | 63       | 64       | 62       |         |
| AF543829 | 99       | 99      | 78      | 97       | 85       | 97      | 74      | 85       | 97       | 97       | 97       | 97       | 61      | 62       | 61       | 62       | 61       | 61       | 61       | 61       | 60       | 59      | 62       | 62       | 59       | 71       | 71       | 68       | 68       | 64      | 64      | 64      | 65       | 63       | 64       | 63     | 63       | 64       | 62       |         |
| AB010301 | 99       | 99      | 78      | 97       | 85       | 97      | 74      | 85       | 97       | 97       | 97       | 97       | 61      | 62       | 61       | 62       | 61       | 61       | 61       | 61       | 60       | 59      | 62       | 62       | 59       | 71       | 71       | 68       | 68       | 64      | 64      | 64      | 65       | 63       | 64       | 63     | 63       | 64       | 62       |         |
| KX034780 | 99       | 99      | 78      | 97       | 85       | 97      | 74      | 85       | 97       | 97       | 97       | 97       | 61      | 62       | 61       | 62       | 61       | 61       | 61       | 61       | 60       | 59      | 62       | 62       | 59       | 71       | 71       | 68       | 68       | 64      | 64      | 64      | 65       | 63       | 64       | 63     | 63       | 64       | 62       |         |
| KP55566  | 99       | 99      | 78      | 97       | 85       | 97      | 74      | 85       | 97       | 97       | 97       | 97       | 61      | 62       | 61       | 62       | 61       | 61       | 61       | 61       | 60       | 59      | 62       | 62       | 59       | 71       | 71       | 68       | 68       | 64      | 64      | 64      | 65       | 63       | 64       | 63     | 63       | 64       | 62       |         |
| JQ899447 | 99       | 99      | 78      | 97       | 85       | 97      | 74      | 85       | 97       | 97       | 97       | 97       | 61      | 62       | 61       | 62       | 61       | 61       | 61       | 61       | 60       | 59      | 62       | 62       | 59       | 71       | 71       | 68       | 68       | 64      | 64      | 64      | 65       | 63       | 64       | 63     | 63       | 64       | 62       |         |
| JN019814 | 99       | 99      | 78      | 97       | 85       | 97      | 74      | 85       | 97       | 97       | 97       | 97       | 61      | 62       | 61       | 62       | 61       | 61       | 61       | 61       | 60       | 59      | 62       | 62       | 59       | 71       | 71       | 68       | 68       | 64      | 64      | 64      | 65       | 63       | 64       | 63     | 63       | 64       | 62       |         |
| HM777004 | 99       | 99      | 78      | 97       | 85       | 97      | 74      | 85       | 97       | 97       | 97       | 97       | 61      | 62       | 61       | 62       | 61       | 61       | 61       | 61       | 60       | 59      | 62       | 62       | 59       | 71       | 71       | 68       | 68       | 64      | 64      | 64      | 65       | 63       | 64       | 63     | 63       | 64       | 62       |         |
| KF555653 | 99       | 99      | 78      | 97       | 85       | 97      | 74      | 85       | 97       | 97       | 97       | 97       | 61      | 62       | 61       | 62       | 61       | 61       | 61       | 61       | 60       | 59      | 62       | 62       | 59       | 71       | 71       | 68       | 68       | 64      | 64      | 64      | 65       | 63       | 64       | 63     | 63       | 64       | 62       |         |
| KF446210 | 99       | 99      | 78      | 97       | 85       | 97      | 74      | 85       | 97       | 97       | 97       | 97       | 61      | 62       | 61       | 62       | 61       | 61       | 61       | 61       | 60       | 59      | 62       | 62       | 59       | 71       | 71       | 68       | 68       | 64      | 64      | 64      | 65       | 63       | 64       | 63     | 63       | 64       | 62       |         |
| JX488630 | 99       | 99      | 78      | 97       | 85       | 97      | 74      | 85       | 97       | 97       | 97       | 97       | 61      | 62       | 61       | 62       | 61       | 61       | 61       | 61       | 60       | 59      | 62       | 62       | 59       | 71       | 71       | 68       | 68       | 64      | 64      | 64      | 65       | 63       | 64       | 63     | 63       | 64       | 62       |         |
| JN019815 | 99       | 99      | 78      | 97       | 85       | 97      | 74      | 85       | 97       | 97       | 97       | 97       | 61      | 62       | 61       | 62       | 61       | 61       | 61       | 61       | 60       | 59      | 62       | 62       | 59       | 71       | 71       | 68       | 68       | 64      | 64      | 64      | 65       | 63       | 64       | 63     | 63       | 64       | 62       |         |
| LN67527  | 99       | 99      | 78      | 97       | 85       | 97      | 74      | 85       | 97       | 97       | 97       | 97       | 61      | 62       | 61       | 62       | 61       | 61       | 61       | 61       | 60       | 59      | 62       | 62       | 59       | 71       | 71       | 68       | 68       | 64      | 64      | 64      | 65       | 63       | 64       | 63     | 63       | 64       | 62       |         |
| KP71369  | 99       | 99      | 78      | 97       | 85       | 97      | 74      | 85       | 97       | 97       | 97       | 97       | 61      | 62       | 61       | 62       | 61       | 61       | 61       | 61       | 60       | 59      | 62       | 62       | 59       | 71       | 71       | 68       | 68       | 64      | 64      | 64      | 65       | 63       | 64       | 63     | 63       | 64       | 62       |         |
| KF51028  | 99       | 99      | 78      | 97       | 85       | 97      | 74      | 85       | 97       | 97       | 97       | 97       | 61      | 62       | 61       | 62       | 61       | 61       | 61       | 61       | 60       | 59      | 62       | 62       | 59       | 71       | 71       | 68       | 68       | 64      | 64      | 64      | 65       | 63       | 64       | 63     | 63       | 64       | 62       |         |
| JX429971 | 99       | 99      | 78      | 97       | 85       | 97      | 74      | 85       | 97       | 97       | 97       | 97       | 61      | 62       | 61       | 62       | 61       | 61       | 61       | 61       | 60       | 59      | 62       | 62       | 59       | 71       | 71       | 68       | 68       | 64      | 64      | 64      | 65       | 63       | 64       | 63     | 63       | 64       | 62       |         |
| JX429969 | 99       | 99      | 78      | 97       | 85       | 97      | 74      | 85       | 97       | 97       | 97       | 97       | 61      | 62       | 61       | 62       | 61       | 61       | 61       | 61       | 60       | 59      | 62       | 62       | 59       | 71       | 71       | 68       | 68       | 64      | 64      | 64      | 65       | 63       | 64       | 63     | 63       | 64       | 62       |         |
| JQ807994 | 99       | 99      | 78      | 97       | 85       | 97      | 74      | 85       | 97       | 97       | 97       | 97       | 61      | 62       | 61       | 62       | 61       | 61       | 61       | 61       | 60       | 59      | 62       | 62       | 59       | 71       | 71       | 68       | 68       | 64      | 64      | 64      | 65       | 63       | 64       | 63     | 63       | 64       | 62       |         |
| GM7542   | 99       | 99      | 78      | 97       | 85       | 97      | 74      | 85       | 97       | 97       | 97       | 97       | 61      | 62       | 61       | 62       | 61       | 61       | 61       | 61       | 60       | 59      | 62       | 62       | 59       | 71       | 71       | 68       | 68       | 64      | 64      | 64      | 65       | 63       | 64       | 63     | 63       | 64       | 62       |         |
| MH686311 | 99       | 99      | 78      | 97       | 85       | 97      | 74      | 85       | 97       | 97       | 97       | 97       | 61      | 62       | 61       | 62       | 61       | 61       | 61       | 61       | 60       | 59      | 62       | 62       | 59       | 71       | 71       | 68       | 68       | 64      | 64      | 64      | 65       | 63       | 64       | 63     | 63       | 64       | 62       |         |
| MH686312 | 99       | 99      | 78      | 97       | 85       | 97      | 74      | 85       | 97       | 97       | 97       | 97       | 61      | 62       | 61       | 62       | 61       | 61       | 61       | 61       | 60       | 59      | 62       | 62       | 59       | 71       | 71       | 68       | 68       | 64      | 64      | 64      | 65       | 63       | 64       | 63     | 63       | 64       | 62       |         |
| MH686313 | 99       | 99      | 78      | 97       | 85       | 97      | 74      | 85       | 97       | 97       | 97       | 97       | 61      | 62       | 61       | 62       | 61       | 61       | 61       | 61       | 60       | 59      | 62       | 62       | 59       | 71       | 71       | 68       | 68       | 64      | 64      | 64      | 65       | 63       | 64       | 63     | 63       | 64       | 62       |         |
| AJ32229  | 99       | 99      | 78      | 97       | 85       | 97      | 74      | 85       | 97       | 97       | 97       | 97       | 61      | 62       | 61       | 62       | 61       | 61       | 61       | 61       | 60       | 59      | 62       | 62       | 59       | 71       | 71       | 68       | 68       | 64      | 64      | 64      | 65       | 63       | 64       | 63     | 63       | 64       | 62       |         |

|          |     |     |     |     |     |     |     |     |     |     |     |     |     |     |     |     |     |     |     |     |     |     |     |     |     |     |     |     |     |     |     |     |     |     |     |     |     |     |     |     |     |
|----------|-----|-----|-----|-----|-----|-----|-----|-----|-----|-----|-----|-----|-----|-----|-----|-----|-----|-----|-----|-----|-----|-----|-----|-----|-----|-----|-----|-----|-----|-----|-----|-----|-----|-----|-----|-----|-----|-----|-----|-----|-----|
| MH686311 | 64. | 65. | 62. | 65. | 67. | 64. | 60. | 63. | 64. | 64. | 63. | 64. | 76. | 76. | 77. | 76. | 76. | 75. | 74. | 74. | 74. | 65. | 64. | 65. | 65. | 66. | 72. | 61. | 62. | 61. | 62. | 99. | 91. | 95. | 91. | 95. | 94. | 94. | 94. | 94. | 94. |
| GarVX    | 83. | 11. | 04. | 09. | 09. | 11. | 96. | 36. | 42. | 08. | 57. | 15. | 93. | 72. | 21. | 79. | 04. | 64. | 90. | 94. | 23. | 60. | 55. | 26. | 72. | 04. | 06. | 24. | 65. | 32. | 27. | 01. | 81. | 21. | 60. | 13. | 67. | 51. | 94. | 95. |     |
| AJ292229 | 62. | 64. | 61. | 62. | 66. | 61. | 60. | 62. | 62. | 62. | 61. | 62. | 75. | 75. | 75. | 75. | 74. | 74. | 73. | 74. | 63. | 63. | 64. | 64. | 63. | 60. | 61. | 60. | 61. | 94. | 91. | 95. | 91. | 94. | 94. | 93. | 94. | 94. | 94. |     |     |
| GarVX    | 99. | 42. | 91. | 99. | 30. | 92. | 68. | 30. | 61. | 12. | 62. | 18. | 31. | 91. | 58. | 98. | 57. | 08. | 11. | 15. | 97. | 72. | 86. | 82. | 83. | 50. | 67. | 84. | 99. | 81. | 68. | 05. | 76. | 77. | 41. | 99. | 60. | 27. | 65. |     |     |
